# Supplementary material for: Analysis of aqueous humor total antioxidant capacity and its correlation with corneal endothelial health
Source: PubMed Central journal article supplement (PMC8126826; doi:10.1002/btm2.10199), 2020-12-05
Supplement: BTM2-6-e10199-s001.pdf [file BTM2-6-e10199-s001.pdf]

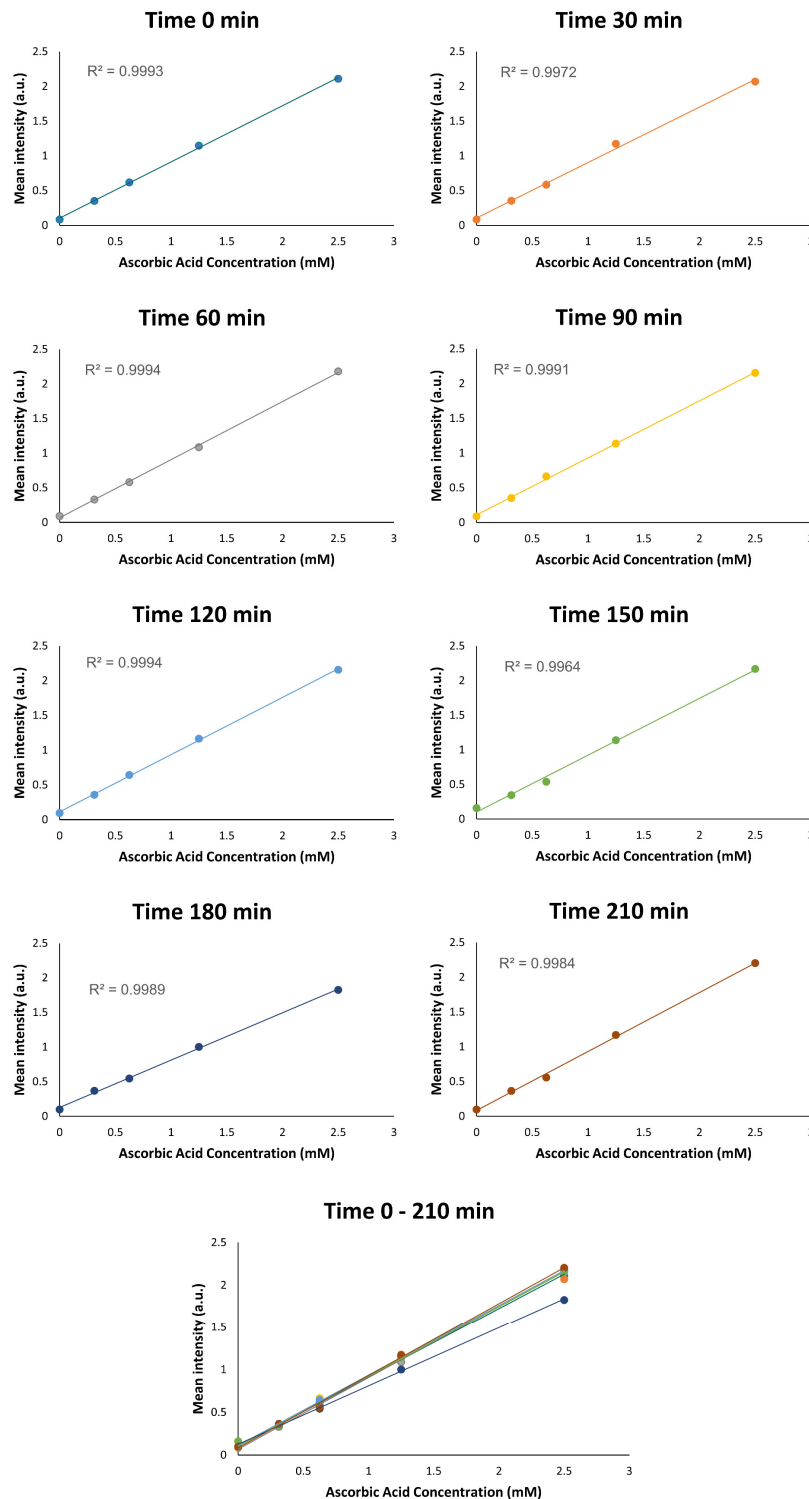

**Supplementary Figure 3. The performance of cupric ion-based total antioxidant capacity (CuTAC) assay under different starting time point in room temperature. The CuTAC assay showed highly linear relationship with serial ascorbic acid concentrations under different starting time point in room temperature. The overlapping line charts was illustrated at the bottom of the figure.**
