# Supplementary material for: Analysis of aqueous humor total antioxidant capacity and its correlation with corneal endothelial health
Source: PubMed Central journal article supplement (PMC8126826; doi:10.1002/btm2.10199), 2020-12-05
Supplement: BTM2-6-e10199-s002.pdf [file BTM2-6-e10199-s002.pdf]

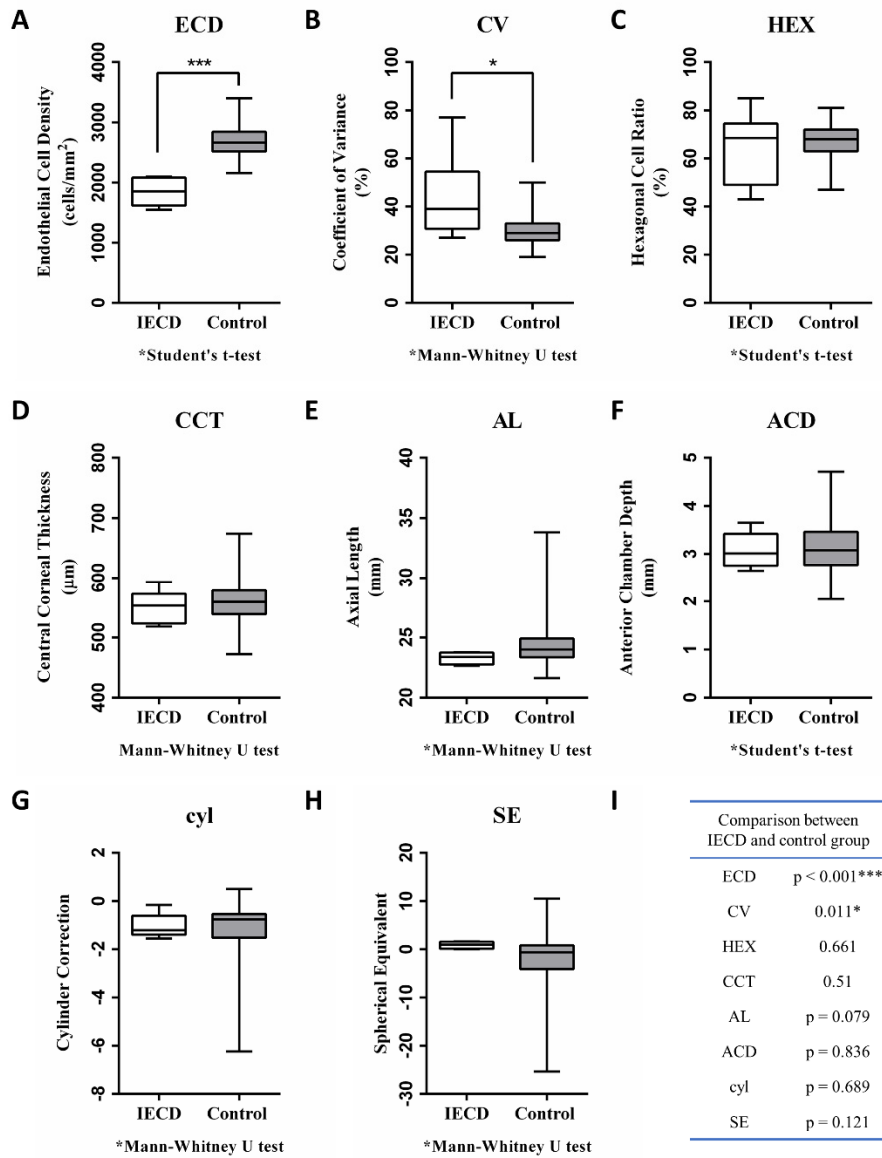

**Supplementary Figure 4. The comparison of corneal endothelial and biometrical parameters between patients with insufficient endothelial cell density (IECD) and the control group.** (A) The endothelial cell density (ECD) value was significantly lower in the IECD group compared to the control group. ( $1843.83 \pm 253.08$  vs.  $2677.68 \pm 252.42$  cells / mm<sup>2</sup>,  $P < 0.001$ ) (B) The coefficient of variation (CV) value was significantly higher in the IECD group compared to the CV control group. ( $43.5 \pm 17.87$  vs.  $29.9 \pm 5.88$  %,  $P = 0.011$ ) (C) There was no significant difference between both groups in hexagonal cell ratio (HEX) value. ( $64.5 \pm 15.1$  vs.  $67.38 \pm 6.21$  %,  $P = 0.661$ ) (D) There was no significant difference between both groups in central corneal thickness (CCT) value. ( $551.33 \pm 27.69$  vs.  $560.07 \pm 33.84$  μm,  $P = 0.51$ ) (E) There was no significant difference between both groups in axial length (AL) value. ( $23.3 \pm 0.52$  vs.  $24.66 \pm 2.26$  mm,  $P = 0.079$ ) (F) There was no significant difference between both groups in anterior chamber depth (ACD) value. ( $3.07 \pm 0.38$  vs.  $3.12 \pm 0.47$  mm,  $P = 0.836$ ) (G) There was no significant difference between both groups in cylinder correction (cyl) value. ( $-1.04 \pm 0.53$  vs.  $-1.07 \pm 0.91$ ,  $P = 0.689$ ) (H) There was no significant difference between both groups in spherical equivalent (SE) value. ( $0.88 \pm 0.76$  vs.  $-2.77 \pm 6.91$  mm,  $P = 0.121$ ) (I) The analyzed  $P$  value of above-mentioned parameters. There were only significant differences in ECD and CV values between IECD and control group. All of these comparisons were analyzed by Student's t test or Mann-Whitney U test.
