# Supplementary material for: Analysis of aqueous humor total antioxidant capacity and its correlation with corneal endothelial health
Source: PubMed Central journal article supplement (PMC8126826; doi:10.1002/btm2.10199), 2020-12-05
Supplement: BTM2-6-e10199-s003.pdf [file BTM2-6-e10199-s003.pdf]

Table S1. List of antioxidant proteins identified in the aqueous humor proteomics

| Protein name                               | Accession | Peptides | Unique Peptides | Coverage (%) | MudPIT score | MW [kDa] | PSM    |
|--------------------------------------------|-----------|----------|-----------------|--------------|--------------|----------|--------|
| Serum albumin                              | P02768    | 31       | 31              | 58.95        | 1324.87      | 69.32    | 1277.5 |
| Serotransferrin                            | P02787    | 33       | 33              | 60.6         | 2179.02      | 77.01    | 253    |
| Alpha-1-antitrypsin                        | P01009    | 10       | 10              | 28.23        | 548.87       | 46.71    | 91.25  |
| Apolipoprotein A-I                         | P02647    | 10       | 10              | 43.07        | 645.27       | 30.76    | 43.25  |
| Ceruloplasmin                              | P00450    | 40       | 40              | 49.2         | 3888.08      | 122.13   | 63.75  |
| Apolipoprotein A-IV                        | P06727    | 18       | 18              | 51.26        | 694.84       | 45.37    | 30.25  |
| Apolipoprotein E                           | P02649    | 9        | 9               | 37.85        | 518.80       | 36.13    | 23.5   |
| Glutathione peroxidase                     | P22352    | 6        | 6               | 32.3         | 661.29       | 25.54    | 6.25   |
| Apolipoprotein D                           | P05090    | 4        | 4               | 25.93        | 122.47       | 21.26    | 10.75  |
| Haptoglobin                                | P00738    | 2        | 2               | 8.37         | 54.03        | 45.18    | 22.5   |
| Peroxiredoxin-2                            | P32119    | 7        | 7               | 28.79        | 237.02       | 21.88    | 6.75   |
| Superoxide dismutase [Cu-Zn]               | P00441    | 5        | 5               | 60.39        | 249.60       | 15.93    | 0.75   |
| Peroxiredoxin-6                            | P30041    | 2        | 2               | 9.38         | 37.23        | 25.02    | 0.75   |
| Catalase                                   | P04040    | 11       | 11              | 27.51        | 581.25       | 59.72    | 6.75   |
| Extracellular superoxide dismutase [Cu-Zn] | P08294    | 7        | 7               | 39.58        | 497.49       | 25.83    | 3.6    |
| Amyloid beta A4 protein                    | P05067    | 7        | 7               | 13.12        | 357.51       | 86.89    | 2.6    |
| Selenoprotein P                            | P49908    | 2        | 2               | 4.72         | 141.77       | 43.16    | 0.8    |
| Protein/nucleic acid deglycase DJ-1        | Q99497    | 2        | 2               | 17.46        | 63.43        | 6.79     | 0.4    |
| Cytochrome c                               | P99999    | 2        | 2               | 29.52        | 63.11        | 11.74    | 0.6    |
| Protein S100-A9                            | P06702    | 2        | 2               | 17.54        | 53.01        | 13.23    | 1      |
| Glutathione reductase                      | P00390    | 1        | 1               | 2.49         | 37.29        | 56.22    | 0.4    |
| Glutathione S-transferase                  | P09211    | 1        | 1               | 4.76         | 36.81        | 23.34    | 0.2    |
| Glutathione synthetase                     | P48637    | 1        | 1               | 1.69         | 24.13        | 52.35    | 0.2    |
| Thioredoxin                                | P10599    | 1        | 1               | 12.38        | 136.89       | 11.73    | 0.4    |

Peptides: number of identified peptides to a protein group; Unique peptides: number of unique peptides (unshared peptides) to the protein; Coverage: peptide sequence coverage of identified protein (%); MudPIT score: sum of the excess of ions score of each peptide; MW [kDa]: Molecular weight of identified protein ; PSM: Peptide-spectra matches
