# Supplementary material for: Analysis of aqueous humor total antioxidant capacity and its correlation with corneal endothelial health
Source: PubMed Central journal article supplement (PMC8126826; doi:10.1002/btm2.10199), 2020-12-05
Supplement: BTM2-6-e10199-s004.pdf [file BTM2-6-e10199-s004.pdf]

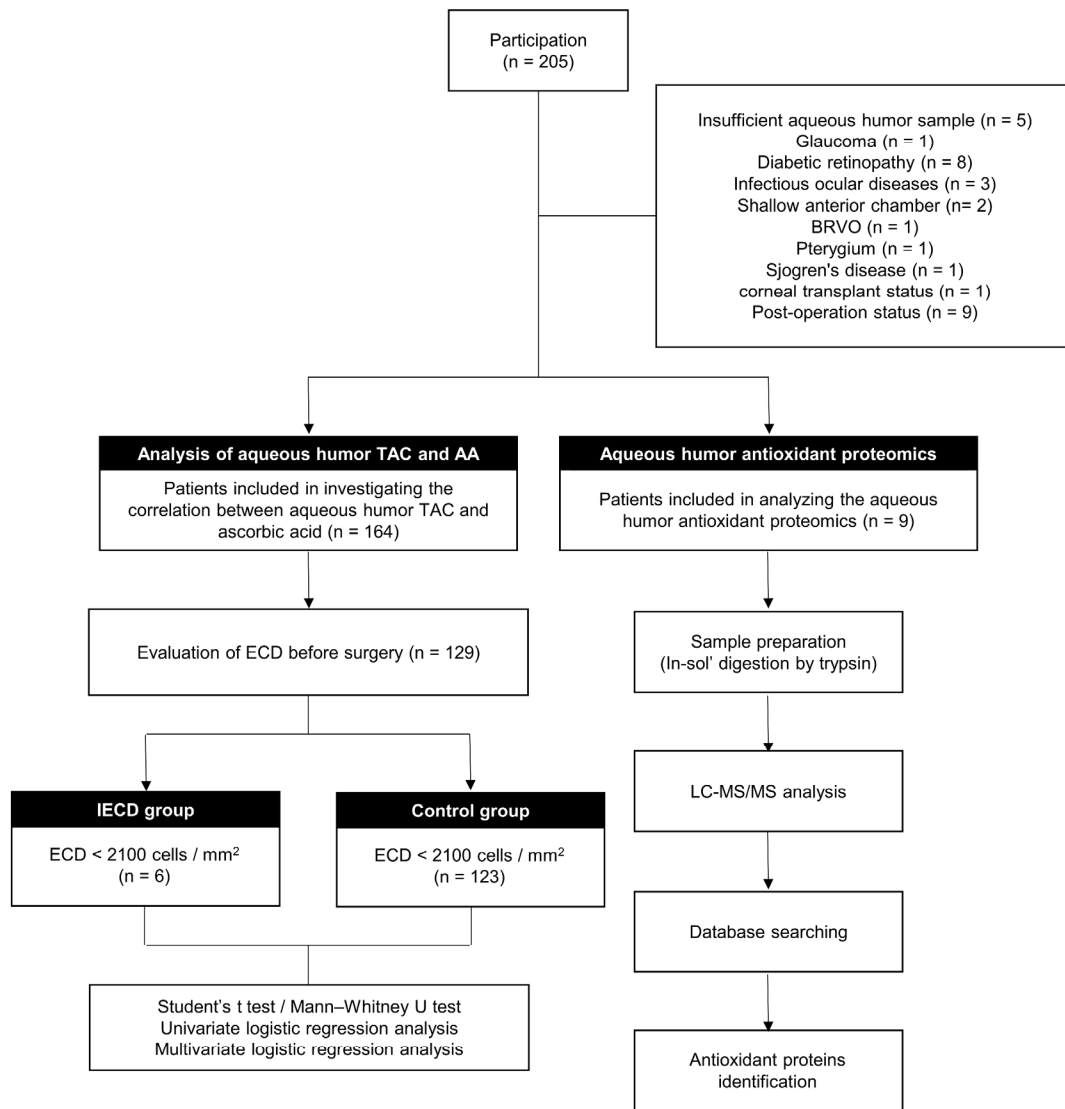

AA = ascorbic acid; BRVO = branch retinal vein occlusion; ECD = endothelial cell density; IECD = insufficient endothelial cell density; TAC = total antioxidant capacity; LC-MS/MS = Liquid chromatography-tandem mass spectrometry

**Supplementary Figure 1. Flow diagram presenting the recruitment process of the study subjects.**
