# Supplementary material for: Analysis of aqueous humor total antioxidant capacity and its correlation with corneal endothelial health
Source: PubMed Central journal article supplement (PMC8126826; doi:10.1002/btm2.10199), 2020-12-05
Supplement: BTM2-6-e10199-s005.pdf [file BTM2-6-e10199-s005.pdf]

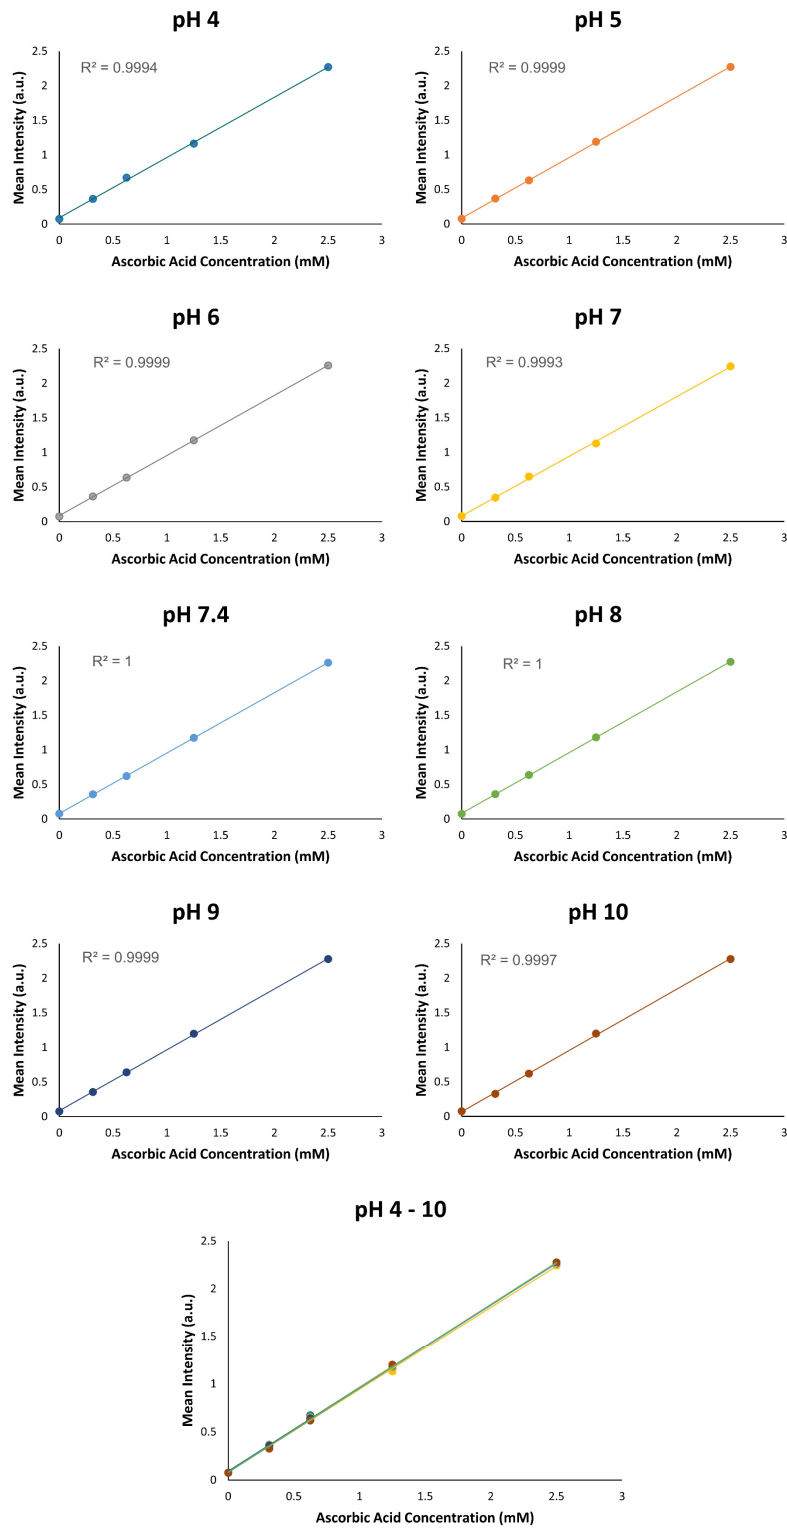

**Supplementary Figure 2.** The performance of cupric ion-based total antioxidant capacity (CuTAC) assay under different pH level from pH4 to pH10. The CuTAC assay showed highly linear relationship with serial ascorbic acid concentrations under different pH level. The overlapping line charts was illustrated at the bottom of the figure.
