# Supplementary material for: Analysis of aqueous humor total antioxidant capacity and its correlation with corneal endothelial health
Source: PubMed Central journal article supplement (PMC8126826; doi:10.1002/btm2.10199), 2020-12-05
Supplement: BTM2-6-e10199-s007.pdf [file BTM2-6-e10199-s007.pdf]

Table S2. Functions of the antioxidant proteins identified in the aqueous humor proteomics<sup>1</sup>

| Protein name                               | Antioxidative activity                                                                                                                                                   | Other functions                                                                                |
|--------------------------------------------|--------------------------------------------------------------------------------------------------------------------------------------------------------------------------|------------------------------------------------------------------------------------------------|
| <b>Elimination of oxidants</b>             |                                                                                                                                                                          |                                                                                                |
| Serum albumin                              | Free radical-trapping <sup>2</sup>                                                                                                                                       | Regulation of the colloidal osmotic pressure<br>Transportation of zinc, calcium, and magnesium |
| Glutathione peroxidase                     | Catalyzation of the reduction of H <sub>2</sub> O <sub>2</sub> , lipid peroxides and organic hydroperoxide                                                               |                                                                                                |
| Peroxiredoxin-2                            | Catalyzation of the reduction of H <sub>2</sub> O <sub>2</sub> and organic hydroperoxides<br>Regulation of the intracellular H <sub>2</sub> O <sub>2</sub> concentration |                                                                                                |
| Superoxide dismutase [Cu-Zn]               | Catalyzation of the reduction of •O <sub>2</sub> <sup>-</sup>                                                                                                            |                                                                                                |
| Peroxiredoxin-6                            | Catalyzation of the reduction of H <sub>2</sub> O <sub>2</sub> and organic hydroperoxides<br>Protection of phospholipid from oxidative damage                            |                                                                                                |
| Catalase                                   | Catalyzation of the reduction of H <sub>2</sub> O <sub>2</sub>                                                                                                           | Promotion of cell growth                                                                       |
| Extracellular superoxide dismutase [Cu-Zn] | Catalyzation of the reduction of •O <sub>2</sub> <sup>-</sup>                                                                                                            |                                                                                                |
| Protein/nucleic acid deglycase DJ-1        | Oxidative stress sensor<br>Elimination of H <sub>2</sub> O <sub>2</sub><br>Reduction of copper<br>Interaction with NADPH oxidase                                         | Neuroprotection                                                                                |
| Cytochrome c                               | Inhibition of H <sub>2</sub> O <sub>2</sub> production<br>Catalyzation of the reduction of •O <sub>2</sub> <sup>-</sup>                                                  | Electron carrier<br>Inducement of apoptosis                                                    |
| Protein S100-A9                            | Oxidant scavenger                                                                                                                                                        | Modulation of the inflammatory and immune response                                             |
| <b>Metal-binding protein</b>               |                                                                                                                                                                          |                                                                                                |
| Serotransferrin                            | Iron-binding antioxidant capacity <sup>3</sup>                                                                                                                           | Stimulation of cell proliferation                                                              |
| Ceruloplasmin                              | Iron-binding antioxidant capacity <sup>3</sup><br>Auxiliary of ascorbic acid                                                                                             | Development of fetal lung                                                                      |
| Amyloid beta A4 protein                    | Reduction of copper<br>Protection of lipoprotein from metal-catalyzed oxidation                                                                                          | Promotion of neuronal growth, adhesion and axonogenesis                                        |

| <b>Lipoprotein-related antioxidant protein</b> |                                                                                                         |                                                                                                 |
|------------------------------------------------|---------------------------------------------------------------------------------------------------------|-------------------------------------------------------------------------------------------------|
| Apolipoprotein A-I                             | Protection of phospholipid from oxidative damage <sup>4</sup>                                           | Transportation of cholesterol to the liver                                                      |
| Apolipoprotein A-IV                            | Inhibition of lipoprotein oxidation <sup>5</sup>                                                        | Secretion and catabolism of chylomicrons and VLDL<br>Transportation of cholesterol to the liver |
| Apolipoprotein D                               | Protection of lipid from oxidative damage<br>Reduction of hydroperoxyeicosatetraenoic acid <sup>6</sup> | Transportation and binding of bilirubin                                                         |
| Apolipoprotein E                               | Protection of cells from beta-amyloid peptides <sup>7</sup>                                             | Transportation of lipid between organs<br>Production, conversion and clearance of lipoprotein   |
| <b>Auxiliary of other antioxidants</b>         |                                                                                                         |                                                                                                 |
| Selenoprotein P                                | Auxiliary of selenium                                                                                   |                                                                                                 |
| Glutathione reductase                          | Reduction of glutathione<br>Catalyzation of the reduction of NADP <sup>+</sup>                          |                                                                                                 |
| Glutathione S-transferase                      | Conjugation of reduced glutathione                                                                      | Prevention of neurodegeneration                                                                 |
| Glutathione synthetase                         | Synthesis of glutathione                                                                                |                                                                                                 |
| <b>Others</b>                                  |                                                                                                         |                                                                                                 |
| Thioredoxin                                    | Catalyzation of the dithiol-disulfide exchange reactions                                                |                                                                                                 |
| Alpha-1-antitrypsin                            | Inhibition of insulin-induced NO synthesis<br>Protection of lung from smoking injury <sup>8</sup>       | Inhibition of proteases including trypsin, chymotrypsin, plasminogen etc.                       |
| Haptoglobin                                    | Protection of cells from hemoglobin-driven oxidative damage <sup>9</sup>                                | Recycle of heme iron<br>Antibacterial activity<br>Modulation of the acute phase response        |

NADPH: Nicotinamide adenine dinucleotide phosphate; NADP<sup>+</sup>: glyoxylate reductase; VLDL: very low-density lipoproteins

## REFERENCE

1. Consortium TU. UniProt: a worldwide hub of protein knowledge. *Nucleic Acids Research*. 2018;47(D1):D506-D515. doi:10.1093/nar/gky1049
2. Roche M, Rondeau P, Singh NR, Tarnus E, Bourdon E. The antioxidant properties of serum albumin. *FEBS letters*. 2008;582(13):1783-1787.
3. Golizeh M, Lee K, Ilchenko S, et al. Increased serotransferrin and ceruloplasmin

turnover in diet-controlled patients with type 2 diabetes. *Free Radical Biology and Medicine*. 2017;113:461-469.

4. Bielicki JK, Oda MN. Apolipoprotein A-IMilano and apolipoprotein A-IParis exhibit an antioxidant activity distinct from that of wild-type apolipoprotein AI. *Biochemistry*. 2002;41(6):2089-2096.
5. Qu J, Ko C-W, Tso P, Bhargava A. Apolipoprotein A-IV: A Multifunctional Protein Involved in Protection against Atherosclerosis and Diabetes. *Cells*. 2019;8(4):319.
6. Bhatia S, Knoch B, Wong J, et al. Selective reduction of hydroperoxyeicosatetraenoic acids to their hydroxy derivatives by apolipoprotein D: implications for lipid antioxidant activity and Alzheimer's disease. *Biochemical Journal*. 2012;442(3):713-721.
7. Miyata M, Smith JD. Apolipoprotein E allele-specific antioxidant activity and effects on cytotoxicity by oxidative insults and  $\beta$ -amyloid peptides. *Nature genetics*. 1996;14(1):55-61.
8. Marzatico F, Gaetani P, Tartara F, et al. Antioxidant status and  $\alpha$ 1-antiproteinase activity in subarachnoid hemorrhage patients. *Life sciences*. 1998;63(10):821-826.
9. Melamed-Frank M, Lache O, Enav BI, et al. Structure-function analysis of the antioxidant properties of haptoglobin. *Blood, The Journal of the American Society of Hematology*. 2001;98(13):3693-3698.
